# Supplementary material
Source: PubMed Central journal article supplement (PMC4378679)
Supplement: NIHMS667909-supplement-01.pdf [file NIHMS667909-supplement-01.pdf]

**Supplemental Table 1. Mitochondrial enzyme activities, yield and respiratory function at 22 weeks following surgery in Protocol 2.**

| <b>Mitochondrial Function</b>                                                               | <b>18% Protein Diet</b> |                                | <b>30% Protein Diet</b>        |
|---------------------------------------------------------------------------------------------|-------------------------|--------------------------------|--------------------------------|
|                                                                                             | <b>Sham</b><br>(n=16)   | <b>Heart Failure</b><br>(n=21) | <b>Heart Failure</b><br>(n=13) |
| <b>Mitochondrial Enzyme Activities in Whole Tissue</b>                                      |                         |                                |                                |
| Citrate synthase activity ( $\mu\text{mols}\cdot\text{g wet}^{-1}\cdot\text{min}^{-1}$ )    | 132.2 $\pm$ 8.3         | 95.9 $\pm$ 7.3*                | 91.5 $\pm$ 6.7*                |
| MCAD activity ( $\mu\text{mols}\cdot\text{g wet}^{-1}\cdot\text{min}^{-1}$ )                | 13.1 $\pm$ 0.8          | 8.9 $\pm$ 0.7*                 | 8.4 $\pm$ 0.5*                 |
| Aconitase activity ( $\text{mmols}\cdot\text{g wet}^{-1}\cdot\text{min}^{-1}$ )             | 13.3 $\pm$ 1.3          | 10.6 $\pm$ 0.8                 | 8.7 $\pm$ 0.6*                 |
| <b>Subsarcolemmal Mitochondria</b>                                                          |                         |                                |                                |
| Yield (mg mitochondrial protein/g wet mass)                                                 | 16.3 $\pm$ 0.9          | 13.3 $\pm$ 1                   | 14.5 $\pm$ 0.6                 |
| Citrate synthase activity ( $\mu\text{mols}\cdot\text{mg prot.}^{-1}\cdot\text{min}^{-1}$ ) | 2.4 $\pm$ 0.2           | 2.2 $\pm$ 0.1                  | 2.4 $\pm$ 0.2                  |
| MCAD activity ( $\mu\text{mols}\cdot\text{mg prot.}^{-1}\cdot\text{min}^{-1}$ )             | 0.18 $\pm$ 0.02         | 0.17 $\pm$ 0.01                | 0.19 $\pm$ 0.02                |
| Aconitase activity ( $\mu\text{mols}\cdot\text{mg prot.}^{-1}\cdot\text{min}^{-1}$ )        | 50.1 $\pm$ 3.7          | 52.2 $\pm$ 4                   | 59.6 $\pm$ 4.19                |
| <b>Respiration:</b>                                                                         |                         |                                |                                |
| Glutamate + malate: State 3                                                                 | 207.1 $\pm$ 9.7         | 214.3 $\pm$ 11.4               | 180 $\pm$ 12.1                 |
| Glutamate + malate: State 4                                                                 | 34.2 $\pm$ 2.3          | 36 $\pm$ 2.4                   | 29.3 $\pm$ 2.3                 |
| Glutamate + malate: RCR                                                                     | 6.3 $\pm$ 0.4           | 6.2 $\pm$ 0.3                  | 6.3 $\pm$ 0.4                  |
| Glutamate + malate: ADP:O                                                                   | 2.03 $\pm$ 0.08         | 1.89 $\pm$ 0.07                | 2.15 $\pm$ 0.06                |
| Palmitoylcarnitine: State 3                                                                 | 247.2 $\pm$ 13.8        | 207.9 $\pm$ 10.2*              | 199.6 $\pm$ 11.4*              |
| Palmitoylcarnitine: State 4                                                                 | 56.4 $\pm$ 2.7          | 57.4 $\pm$ 2.1                 | 57 $\pm$ 4.8                   |
| Palmitoylcarnitine: RCR                                                                     | 4.4 $\pm$ 0.2           | 3.6 $\pm$ 0.1                  | 3.6 $\pm$ 0.2                  |
| Palmitoylcarnitine: ADP:O                                                                   | 2.23 $\pm$ 0.07         | 2.29 $\pm$ 0.08                | 2.34 $\pm$ 0.09                |
| Rotenone + Succinate: State 3                                                               | 368 $\pm$ 18.3          | 355 $\pm$ 17                   | 332 $\pm$ 19.5                 |
| Rotenone + Succinate: State 4                                                               | 133 $\pm$ 5.6           | 124 $\pm$ 7                    | 123 $\pm$ 9.6                  |
| Rotenone + Succinate: RCR                                                                   | 2.7 $\pm$ 0.1           | 2.9 $\pm$ 0.1                  | 2.8 $\pm$ 0.2                  |
| Rotenone + Succinate: P:O                                                                   | 1.37 $\pm$ 0.08         | 1.45 $\pm$ 0.06                | 1.40 $\pm$ 0.07                |
| <b>Interfibrillar Mitochondria</b>                                                          |                         |                                |                                |
| Yield (mg mitochondrial protein/g wet mass)                                                 | 13.5 $\pm$ 0.5          | 8.5 $\pm$ 0.3*                 | 8.4 $\pm$ 0.9*                 |
| Citrate synthase activity ( $\mu\text{mols}\cdot\text{mg prot.}^{-1}\cdot\text{min}^{-1}$ ) | 2.7 $\pm$ 0.2           | 2.5 $\pm$ 0.1                  | 2.5 $\pm$ 0.1                  |
| MCAD activity ( $\mu\text{mols}\cdot\text{mg prot.}^{-1}\cdot\text{min}^{-1}$ )             | 0.25 $\pm$ 0.02         | 0.19 $\pm$ 0.01                | 0.21 $\pm$ 0.02                |
| Aconitase activity ( $\mu\text{mols}\cdot\text{mg prot.}^{-1}\cdot\text{min}^{-1}$ )        | 47.2 $\pm$ 3.6          | 50.8 $\pm$ 4.5                 | 53 $\pm$ 3.4                   |
| <b>Respiration:</b>                                                                         |                         |                                |                                |
| Glutamate + malate: State 3                                                                 | 242.5 $\pm$ 11          | 234 $\pm$ 9.1                  | 214.5 $\pm$ 16.6               |
| Glutamate + malate: State 4                                                                 | 38.1 $\pm$ 3.2          | 42.1 $\pm$ 2.6                 | 38.7 $\pm$ 3.9                 |
| Glutamate + malate: RCR                                                                     | 6.8 $\pm$ 0.5           | 5.8 $\pm$ 0.2                  | 5.9 $\pm$ 0.5                  |
| Glutamate + malate: ADP:O                                                                   | 2.35 $\pm$ 0.12         | 2.19 $\pm$ 0.09                | 2.36 $\pm$ 0.12                |
| Palmitoyl Carnitine: State 3                                                                | 339.3 $\pm$ 23.8        | 243.7 $\pm$ 15.2*              | 213.1 $\pm$ 7.5*               |
| Palmitoyl Carnitine: State 4                                                                | 70.4 $\pm$ 4.8          | 68.1 $\pm$ 3.6                 | 63.4 $\pm$ 4.7                 |
| Palmitoyl Carnitine: RCR                                                                    | 5.0 $\pm$ 0.4           | 3.6 $\pm$ 0.2*                 | 3.5 $\pm$ 0.2*                 |

|                               |             |             |              |
|-------------------------------|-------------|-------------|--------------|
| Palmitoyl Carnitine: ADP:O    | 2.39 ± 0.1  | 2.36 ± 0.08 | 2.38 ± 0.11  |
| Rotenone + Succinate: State 3 | 498 ± 21.5  | 493 ± 21    | 444.5 ± 30.8 |
| Rotenone + Succinate: State 4 | 176 ± 6.7   | 182 ± 9     | 166 ± 15     |
| Rotenone + Succinate: RCR     | 2.9 ± 0.1   | 2.8 ± 0.1   | 2.8 ± 0.2    |
| Rotenone + Succinate: ADP:O   | 1.42 ± 0.07 | 1.28 ± 0.05 | 1.41 ± 0.07  |

\* p<0.05 compared to the sham group. There were no significant differences between the two heart failure groups.
